# Supplementary material for: A nanocomposite of ferrocenoyl glutaric acid hydrazone and multiwalled carbon nanotubes as a sensor for azide ions
Source: Royal Society of Chemistry journal article supplement (doi:10.1039/c6ay01282e), 2016-01-01
Supplement: c6ay01282e1.pdf [file c6ay01282e1.pdf]

## Supporting Information

For

### **Nanocomposite of ferrocenoyl glutaric acid hydrazone and multiwalled carbon nanotubes as a sensor of azide ion**

**Ida Tiwari\*, Mandakini Gupta, Abhishek Rai, Lallan Mishra**

*Centre of Advanced Study, Department of Chemistry, Institute of Science,  
Banaras Hindu University, Varanasi- 221 005, India*

|                                                                                                                                                                                                                                                                                                                                                                                                                                                                                                            |         |
|------------------------------------------------------------------------------------------------------------------------------------------------------------------------------------------------------------------------------------------------------------------------------------------------------------------------------------------------------------------------------------------------------------------------------------------------------------------------------------------------------------|---------|
| Mass spectroscopic data of ferrocenoyl glutaric acid hydrazone                                                                                                                                                                                                                                                                                                                                                                                                                                             | .....S1 |
| <sup>1</sup> H NMR spectrum of ferrocenoyl glutaric acid hydrazone                                                                                                                                                                                                                                                                                                                                                                                                                                         | .....S2 |
| <sup>13</sup> C NMR spectrum of ferrocenoyl glutaric acid hydrazone                                                                                                                                                                                                                                                                                                                                                                                                                                        | .....S3 |
| IR spectrum of ferrocenoyl glutaric acid hydrazone                                                                                                                                                                                                                                                                                                                                                                                                                                                         | .....S4 |
| CV of ferrocene-4-carboxylaldehyde/MWCNTs/nafion modified GCE at different scan rates (10-250 mV/s; Fig. S5 (a)), photograph showing bad film forming ability of ferrocene-4-carboxylaldehyde/MWCNTs/nafion (Fig. S5 (b)) and photograph showing very good film forming ability of L/MWCNTs/nafion nanocomposite modified electrode (Fig. S5 (c))                                                                                                                                                          | .....S5 |
| Interference data for L/MWCNTs/nafion nanocomposite modified electrode                                                                                                                                                                                                                                                                                                                                                                                                                                     | .....S6 |
| Bar graph (A) Detection of 1.86 mM concentration of azide by varying different concentration of nafion, keeping MWCNTs and L constant, (B) Detection of 1.86 mM concentration of azide by varying different concentration of MWCNTs, keeping nafion and L constant; (C) Detection of 1.86 mM concentration of azide by varying different concentration of L, keeping MWCNTs and nafion constant (D) Effect of deposition time on the response of modified electrode (E) Effect of pH on modified electrode | .....S7 |

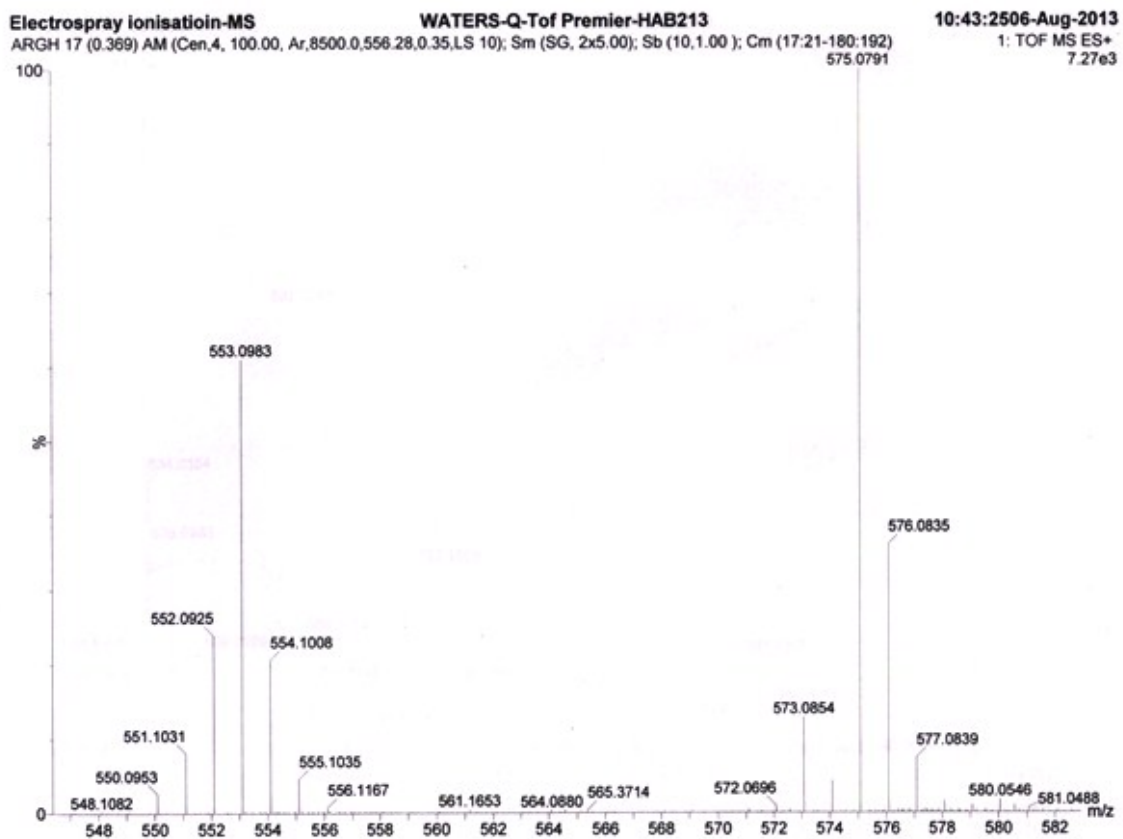

S1:ESI-Mass spectroscopic data of ferrocenoyl glutaric acid hydrazone

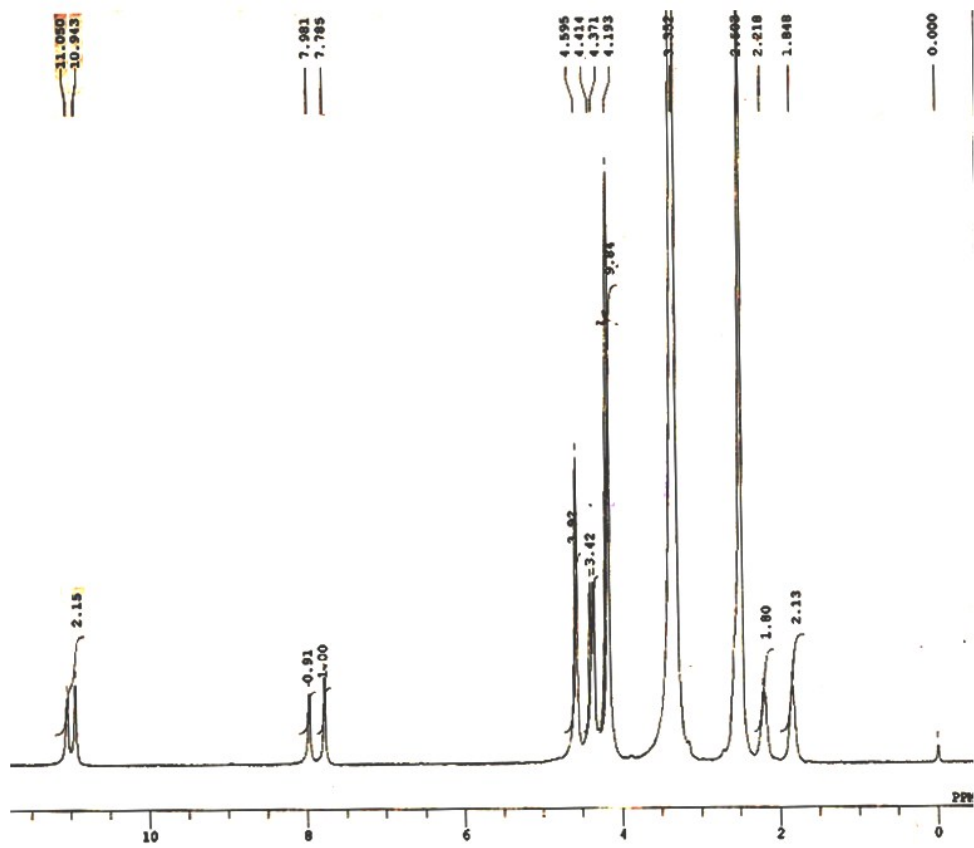

S2:  $^1\text{H}$  NMR spectrum of ferrocenoyl glutaric acid hydrazone

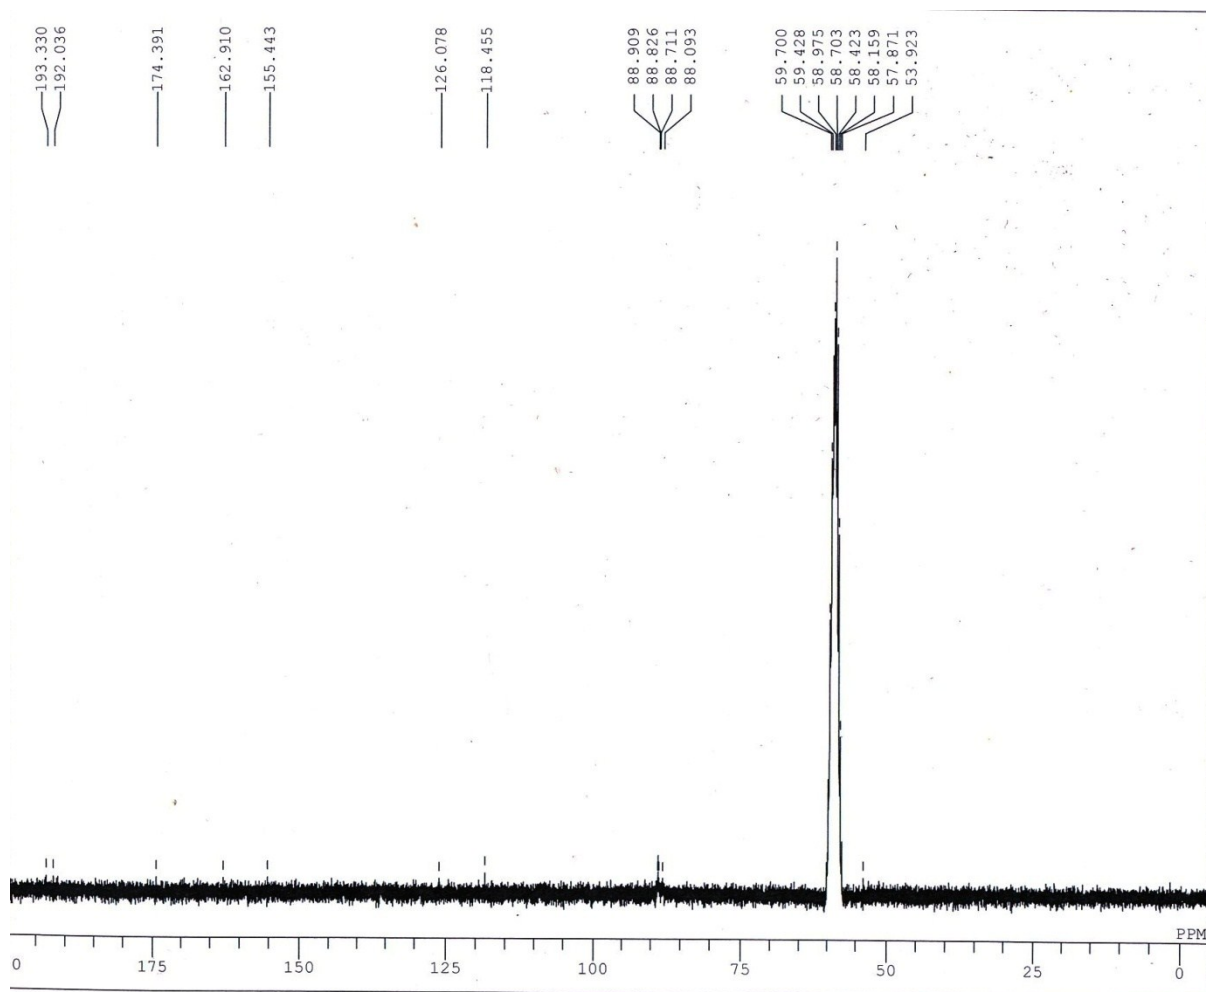

S3:  $^{13}\text{C}$  NMR spectrum of ferrocenoyl glutaric acid hydrazone

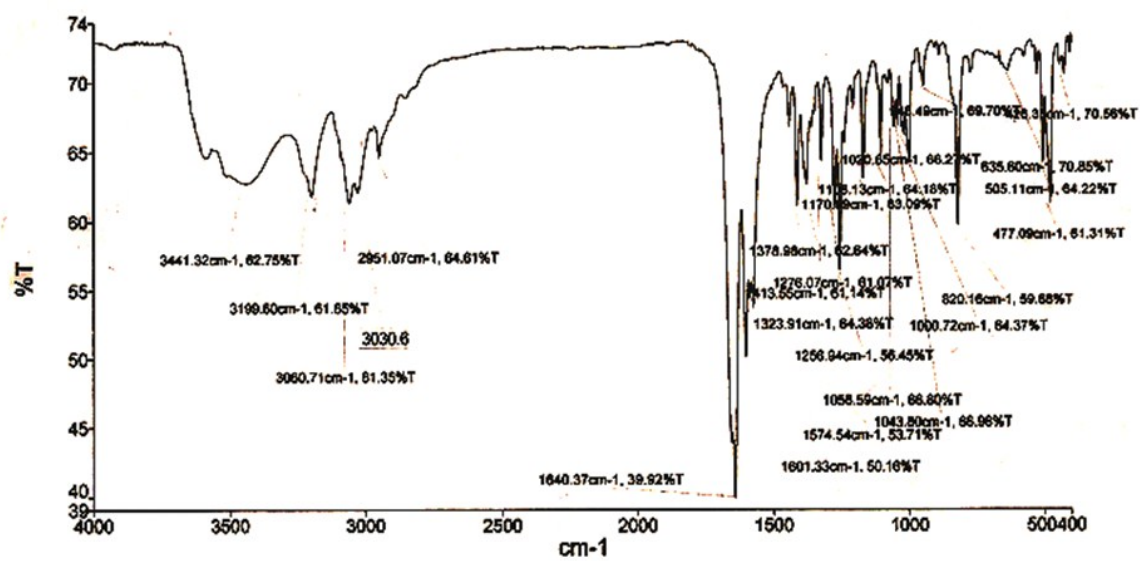

S4:IR spectrum of ferrocenyl glutaric acid hydrazone

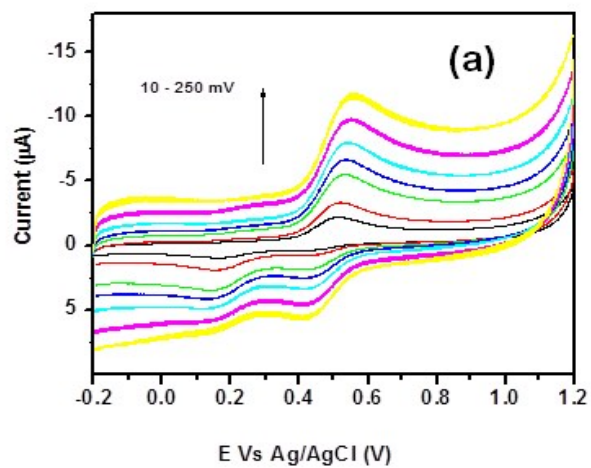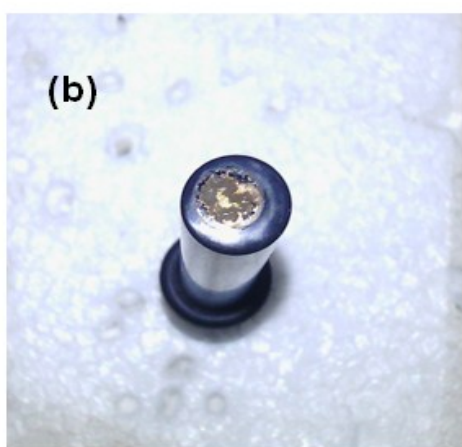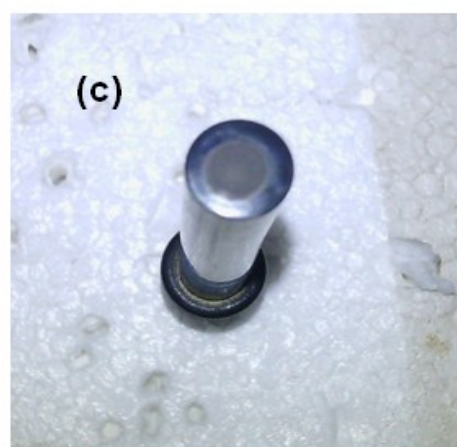

Fig. S5. CV of ferrocene-4-carboxylaldehyde/MWCNTs/nafion modified GCE at different scan rates, 10-250 mV/s (a); photograph of ferrocene-4-carboxylaldehyde/MWCNTs/nafion (b); and photograph of L/MWCNTs/nafion nanocomposite modified electrode (c).

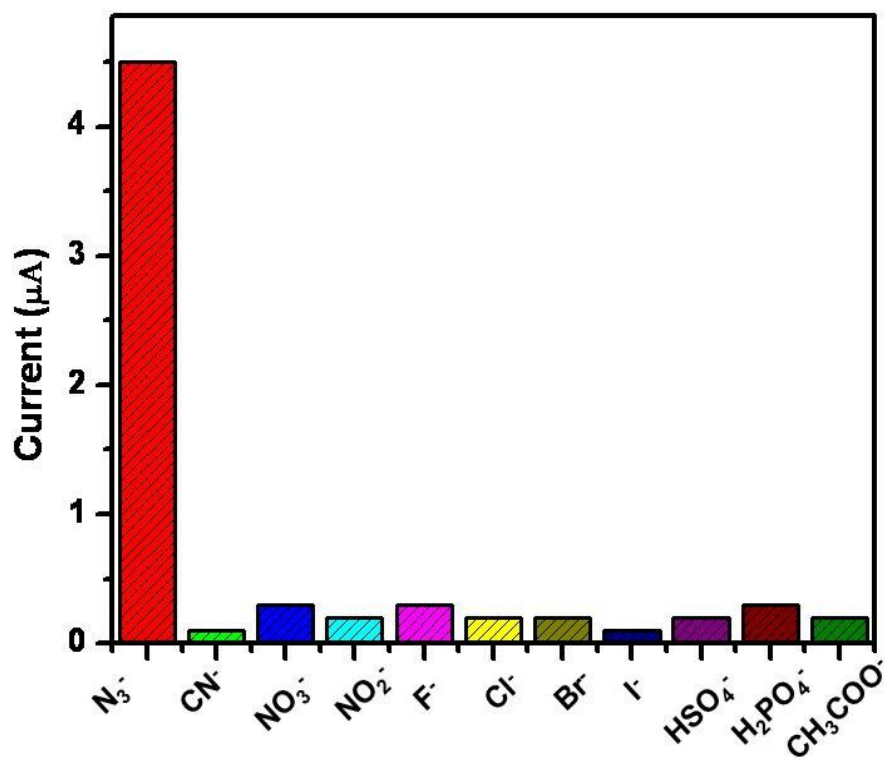

S6: Interference data for L/MWCNTs/nafion nanocomposite modified GCE

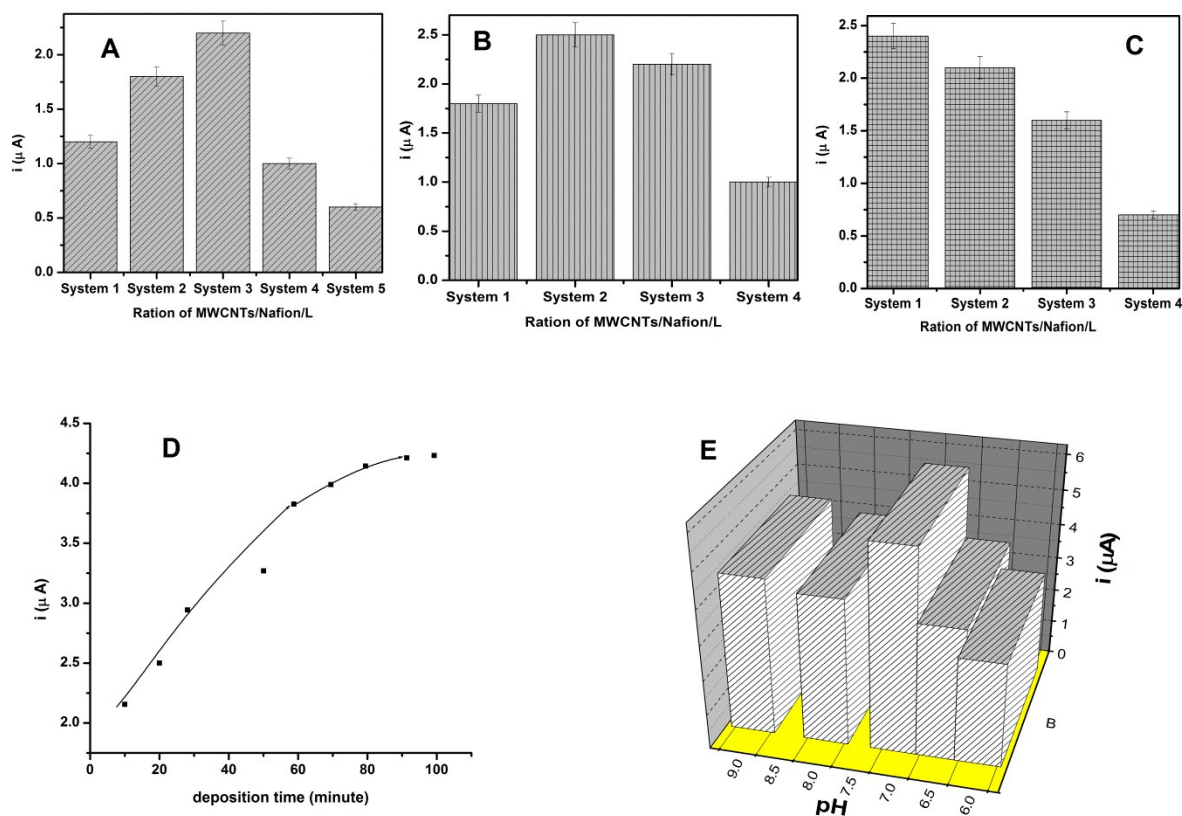

Fig.S7 Bar graph (A) Detection of 0.0422 mM concentration of azide by varying different concentration of nafion, keeping MWCNTs and L constant, (B) Detection of 0.0422 mM concentration of azide by varying different concentration of MWCNTs, keeping nafion and L constant; (C) Detection of 0.0422 mM concentration of azide by varying different concentration of L, keeping MWCNTs and nafion constant (D) Effect of deposition time on the response of modified electrode on addition of 0.0422 mM azide (E) Effect of pH on modified electrode
